# Supplementary material for: Gut microbiota in patients with Alzheimer’s disease spectrum: a systematic review and meta-analysis
Source: Aging (Albany NY). 2022 Jan 14;14(1):477–96. doi: 10.18632/aging.203826 (PMC8791218; doi:10.18632/aging.203826)
Supplement: Supplementary Tables [file aging-14-203826-s001.pdf]

## SUPPLEMENTARY TABLES

**Supplementary Table 1. Bias of the 11 studies included in this meta-analysis based on RoBANS.**

| Study                | The selection of participants | Confounding variables | Measurement of exposure | Blinding of outcome assessments | Incomplete outcome data | Selective outcome reporting |
|----------------------|-------------------------------|-----------------------|-------------------------|---------------------------------|-------------------------|-----------------------------|
| Vogt et al. (2017)   | Low risk                      | High risk             | Low risk                | Low risk                        | Low risk                | Low risk                    |
| Zhuang et al. (2018) | Low risk                      | High risk             | Low risk                | Low risk                        | Low risk                | Low risk                    |
| Haran et al. (2019)  | Low risk                      | High risk             | Low risk                | Low risk                        | Low risk                | Low risk                    |
| Li et al. (2019)     | Low risk                      | High risk             | Low risk                | Low risk                        | Low risk                | Low risk                    |
| Liu et al. (2019)    | Low risk                      | High risk             | Low risk                | Low risk                        | Low risk                | Low risk                    |
| Nagpal et al. (2019) | Low risk                      | High risk             | Low risk                | Low risk                        | Low risk                | Low risk                    |
| Hou et al. (2021)    | Low risk                      | Low risk              | Low risk                | Low risk                        | Low risk                | Low risk                    |
| Liu et al. (2021)    | Low risk                      | High risk             | Low risk                | Low risk                        | Low risk                | Low risk                    |
| Sheng et al. (2021)  | Low risk                      | High risk             | Low risk                | Low risk                        | Low risk                | Low risk                    |
| Zhang et al. (2021)  | Low risk                      | High risk             | Low risk                | Low risk                        | Low risk                | Low risk                    |
| Zhou et al. (2021)   | Low risk                      | High risk             | Low risk                | Low risk                        | Low risk                | Low risk                    |

Abbreviation: RoBANS: Risk of Bias Assessment tool for Non-randomized Studies.

**Supplementary Table 2. Publication bias assessments.**

|                            | Begg and Mazumdar rank correlation |         | Egger's regression intercept test |         | Duval and Tweedie's trim and fill |                         |
|----------------------------|------------------------------------|---------|-----------------------------------|---------|-----------------------------------|-------------------------|
|                            | Tau                                | P value | Intercept                         | P value | Observed Hedges' g                | Adjusted Hedges' g      |
| Phylum-Actinobacteria      | 0.500                              | 0.308   | 15.608                            | 0.353   |                                   |                         |
| Phylum_Bacteroidetes       | 0.178                              | 0.536   | 7.657                             | 0.301   |                                   |                         |
| Phylum_Firmicutes          | 0                                  | 1.000   | -3.536                            | 0.683   | -0.086 [-0.889, 0.717]            | -0.272 [-1.068, 0.524]  |
| Phylum_Proteobacteria      | 0                                  | 1.000   | -1.324                            | 0.526   |                                   |                         |
| Class_Bacteroidia          | 0.266                              | 0.452   | 14.817                            | 0.131   |                                   |                         |
| Class_Clostridia           | 0.133                              | 0.707   | -3.045                            | 0.857   |                                   |                         |
| Class_Gammaproteobacteria  | 0.167                              | 0.734   | 3.750                             | 0.265   | -0.208 [-0.464, 0.047]            | -0.292 [-0.568, -0.017] |
| Order_Bacteroidales        | 0.500                              | 0.220   | 21.963                            | 0.081   | 1.038 [-0.392, 2.468]             | 0.530 [-0.881, 1.941]   |
| Order_Clostridiales        | 0.133                              | 0.707   | -2.684                            | 0.883   |                                   |                         |
| Order_Enterobacteriales    | 0.167                              | 0.734   | 5.490                             | 0.448   | -0.229 [-0.521, 0.064]            | -0.334 [-0.643, -0.025] |
| Family_Bacteroidaceae      | 0                                  | 1.000   | -8.140                            | 0.633   |                                   |                         |
| Family_Clostridiaceae      | 0.167                              | 0.734   | 0.539                             | 0.970   |                                   |                         |
| Family_Enterobacteriaceae  | -0.100                             | 0.806   | -2.793                            | 0.349   |                                   |                         |
| Family_Lachnospiraceae     | 0                                  | 1.000   | -4.253                            | 0.717   |                                   |                         |
| Family_Rikenellaceae       | 0                                  | 1.000   | -2.688                            | 0.819   |                                   |                         |
| Family-Ruminococcaceae     | 0.400                              | 0.259   | 13.807                            | 0.139   |                                   |                         |
| Genus_Alistipes            | 0                                  | 1.000   | -4.501                            | 0.686   |                                   |                         |
| Genus_Bacteroides          | -0.178                             | 0.536   | -12.118                           | 0.245   |                                   |                         |
| Genus_Bifidobacterium      | 0                                  | 1.000   | 16.626                            | 0.309   |                                   |                         |
| Genus_Blautia              | -0.285                             | 0.367   | 2.562                             | 0.817   |                                   |                         |
| Genus_Phascolartobacterium | -0.500                             | 0.220   | -3.835                            | 0.326   |                                   |                         |

Note: the observed and adjusted effects sizes were reported only when missing studies were found and corrected by Duval and Tweedie's trim and fill. The Hedges' g was presented as overall effect size [lower limit, upper limit].
